# Supplementary material for: Construction of hierarchical V4C3-MXene/MoS2/C nanohybrids for high rate lithium-ion batteries
Source: Royal Society of Chemistry journal article supplement (doi:10.1039/c9nr07646h), 2019-11-26
Supplement: c9nr07646h1.pdf [file c9nr07646h1.pdf]

Electronic Supplementary Material (ESI) for Nanoscale

## Supporting Information

### **Construction of hierarchical $V_4C_3$ -MXene/MoS<sub>2</sub>/C nanohybrids for high rate lithium-ion batteries**

Jin Bai,<sup>ab</sup> Bangchuan Zhao,<sup>\*a</sup> Shuai Lin,<sup>\*a</sup> Kunzhen Li,<sup>ab</sup> Jiafeng Zhou,<sup>ab</sup> Jianming Dai,<sup>a</sup>  
Xuebin Zhu,<sup>a</sup> and Yuping Sun<sup>ac</sup>

<sup>a</sup>Key Laboratory of Materials Physics, Institute of Solid State Physics, Chinese Academy of Sciences, Hefei 230031, People's Republic of China

<sup>b</sup>University of Science and Technology of China, Hefei 230026, People's Republic of China

Prof. Y. Sun

<sup>c</sup>High Magnetic Field Laboratory, Chinese Academy of Sciences, Hefei 230031, People's Republic of China

**\*Corresponding author E-mails:** bchzhao@issp.ac.cn (Bangchuan Zhao) Tel: +86-0551-6559-1439-205; linshuai17@issp.ac.cn (Shuai Lin)

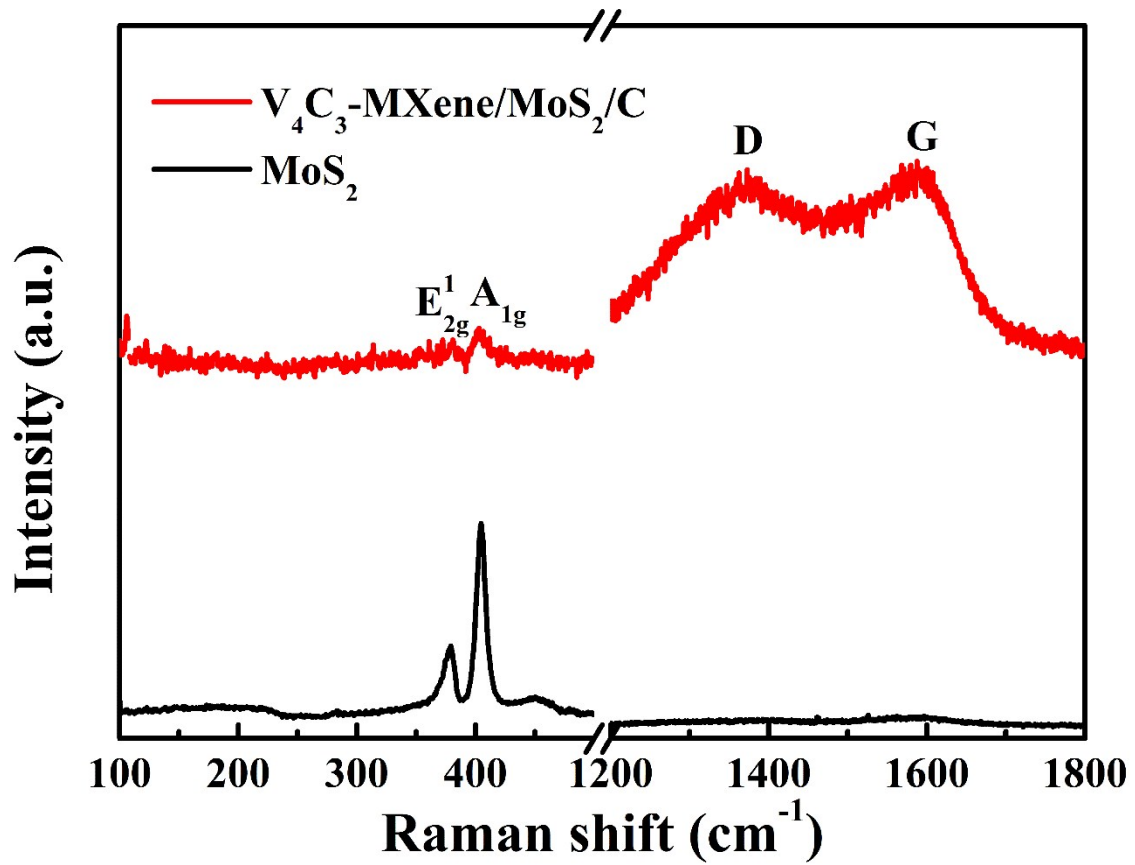

**Fig. S1.** Raman spectra of the MoS<sub>2</sub> and V<sub>4</sub>C<sub>3</sub>-MXene/MoS<sub>2</sub>/C nanohybrid.

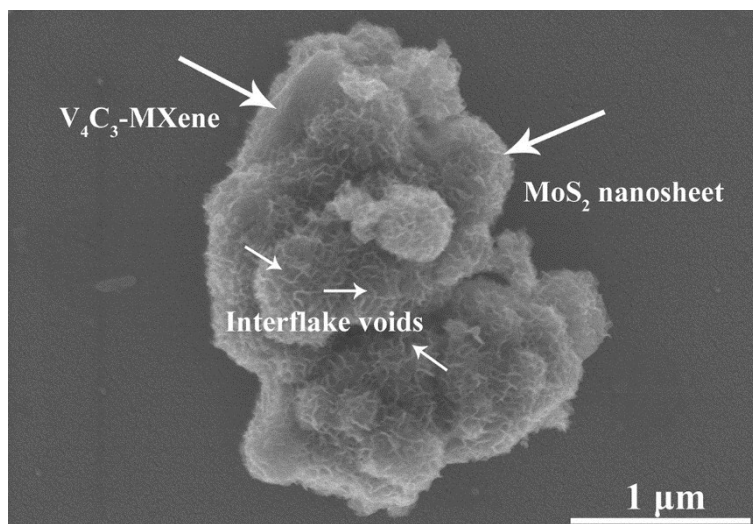

**Fig. S2.** SEM image of V<sub>4</sub>C<sub>3</sub>-MXene exposed from MoS<sub>2</sub> layer in the V<sub>4</sub>C<sub>3</sub>-MXene/MoS<sub>2</sub>/C nanohybrid.

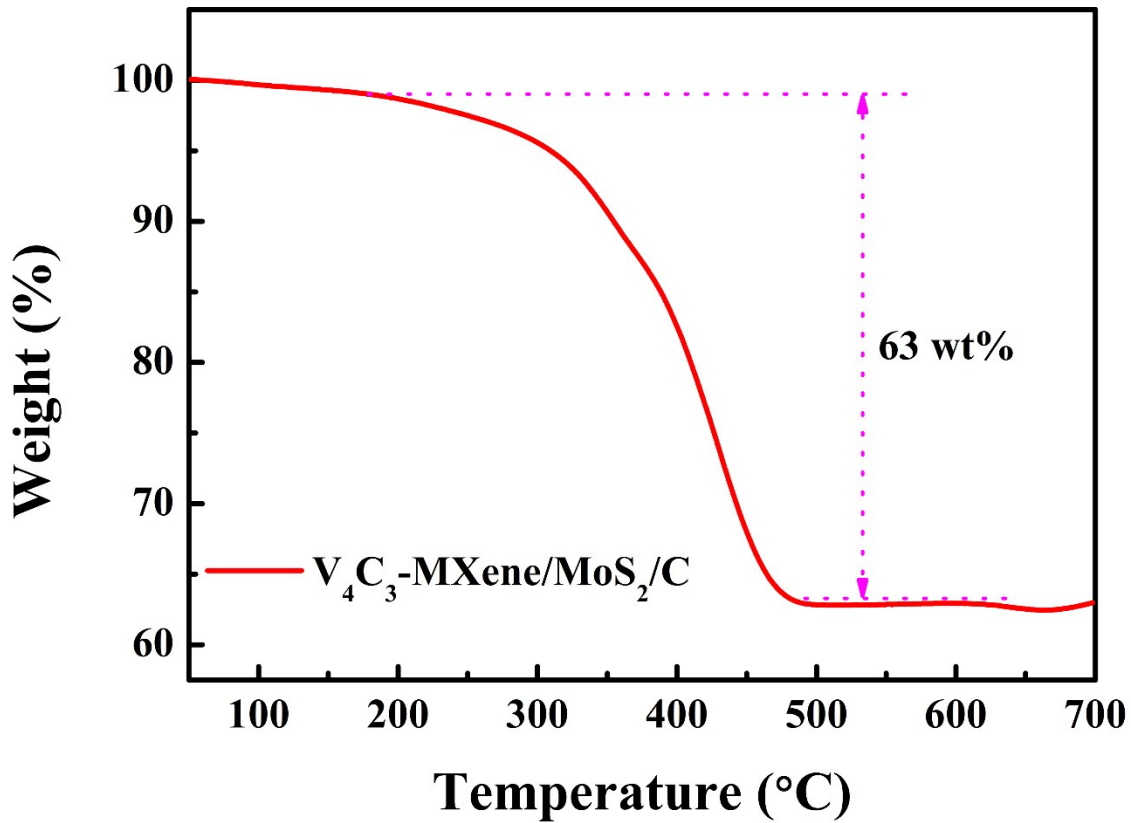

**Fig. S3.** TGA curve of the V<sub>4</sub>C<sub>3</sub>-MXene/MoS<sub>2</sub>/C nanohybrid.

**Detailed process about TGA calculation:** In the temperature range from 50 to 700 °C in air, the main weight loss is composed of three parts: the oxidation of the N-doped carbon and the oxidation of MoS<sub>2</sub> and V<sub>4</sub>C<sub>3</sub>-MXene. The total weight loss is about 37 wt% according to the TGA curve shown in Fig. S3. Assumed to the final product is composed of MoO<sub>3</sub> and V<sub>2</sub>O<sub>5</sub>, the corresponding reaction processes are as follows:

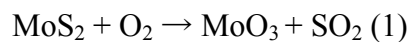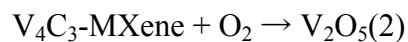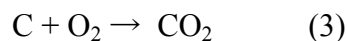

Assumed to molar mass of MoS<sub>2</sub> =  $M_1$ , molar mass of MoO<sub>3</sub> =  $M_2$ , molar mass of V<sub>4</sub>C<sub>3</sub>-MXene =  $M_3$ , molar mass of V<sub>2</sub>O<sub>5</sub> =  $M_4$ , the weight content of the nanohybrid =  $X$ , the content of MoS<sub>2</sub> in the nanohybrid =  $m_1$ , the content of MoO<sub>3</sub> =  $m_2$ , the content of V<sub>4</sub>C<sub>3</sub>-MXene in the nanohybrid =  $m_3$ , the content of V<sub>2</sub>O<sub>5</sub> =  $m_4$ , and the content of carbon in the

nanohybrid =  $m_5$ ,

Due to the final product is  $\text{MoO}_3$  and  $\text{V}_2\text{O}_5$ , so  $m_2 + m_4 = 0.63X$ .

According to Equation (1) and (2),  $m_1 = m_2/M_2 * M_1$ ,  $m_3 = m_4/M_4 * M_3$ ,

Thus, a new equation  $0.89m_1 + 0.76m_3 = 0.63X$  can be obtained.

According to the results of EDS and ICP,  $m_1 \approx 7m_3$ ,

Thus,  $m_1 = 0.63X$ ,  $m_3 = 0.09X$ ,  $m_5 = X - m_1 - m_3 = 0.28X$ .

So, the carbon content in the nanohybrid is about 28 wt%.

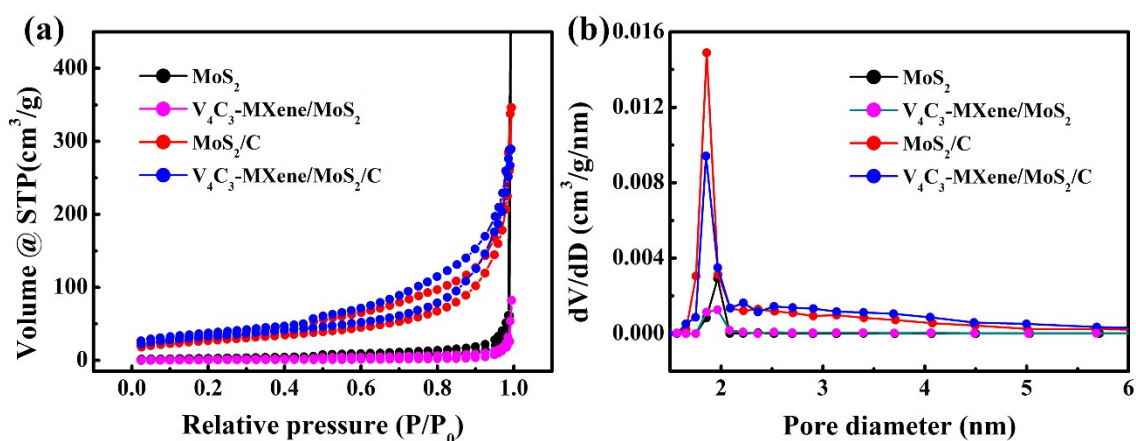

**Fig. S4.** (a)  $\text{N}_2$  adsorption and desorption isotherms and (b) pore size distributions of  $\text{MoS}_2$ ,  $\text{MoS}_2/\text{C}$ ,  $\text{V}_4\text{C}_3\text{-MXene}/\text{MoS}_2$ , and  $\text{V}_4\text{C}_3\text{-MXene}/\text{MoS}_2/\text{C}$  nanohybrid.

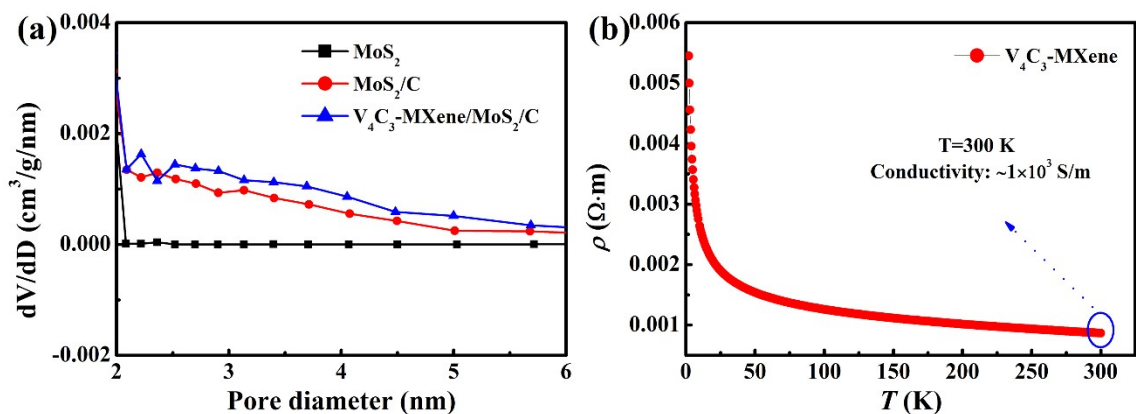

**Fig. S5.** (a) The magnified pore size distribution of the  $\text{MoS}_2$ ,  $\text{MoS}_2/\text{C}$ , and  $\text{V}_4\text{C}_3\text{-MXene}/\text{MoS}_2/\text{C}$  samples. (b) Temperature dependence of resistivity  $\rho(T)$  for the  $\text{V}_4\text{C}_3\text{-MXene}$  matrix.

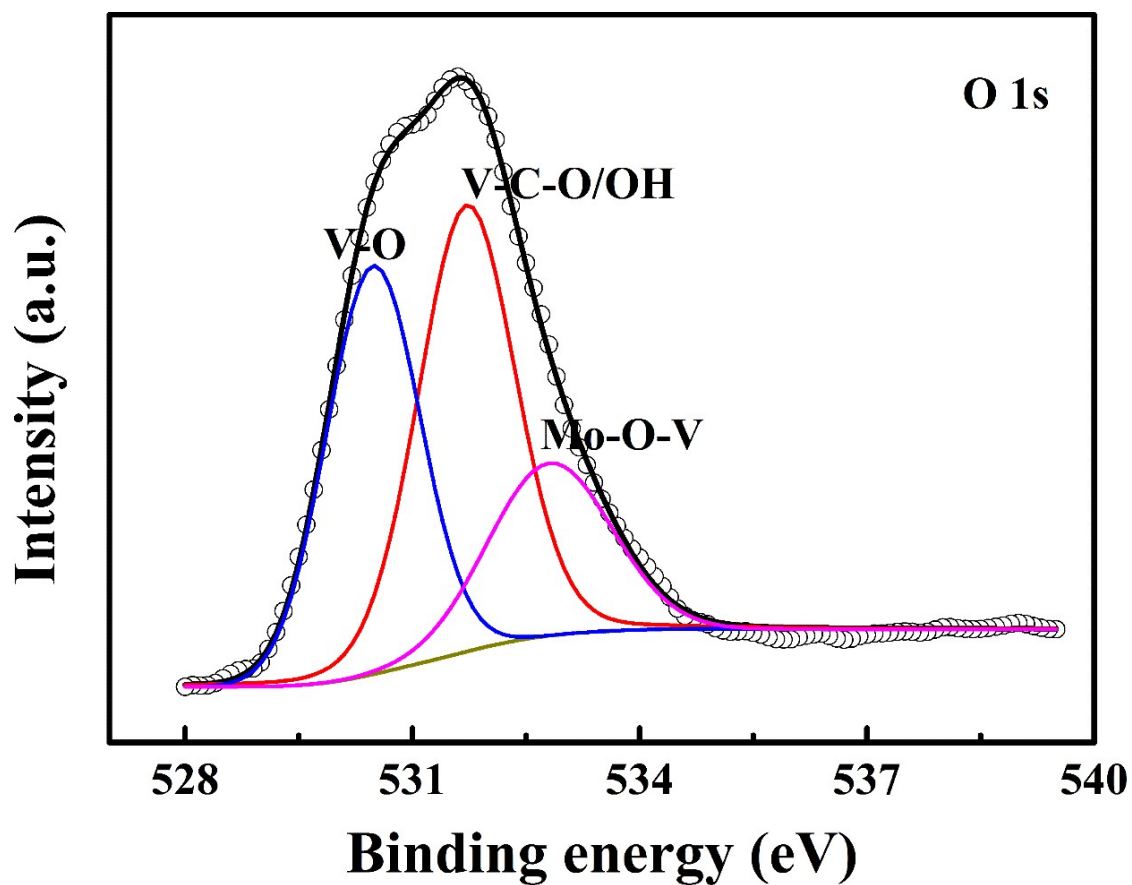

Fig. S6. XPS spectrum of O1s in the  $V_4C_3$ -MXene/ $MoS_2$ /C nanohybrid.

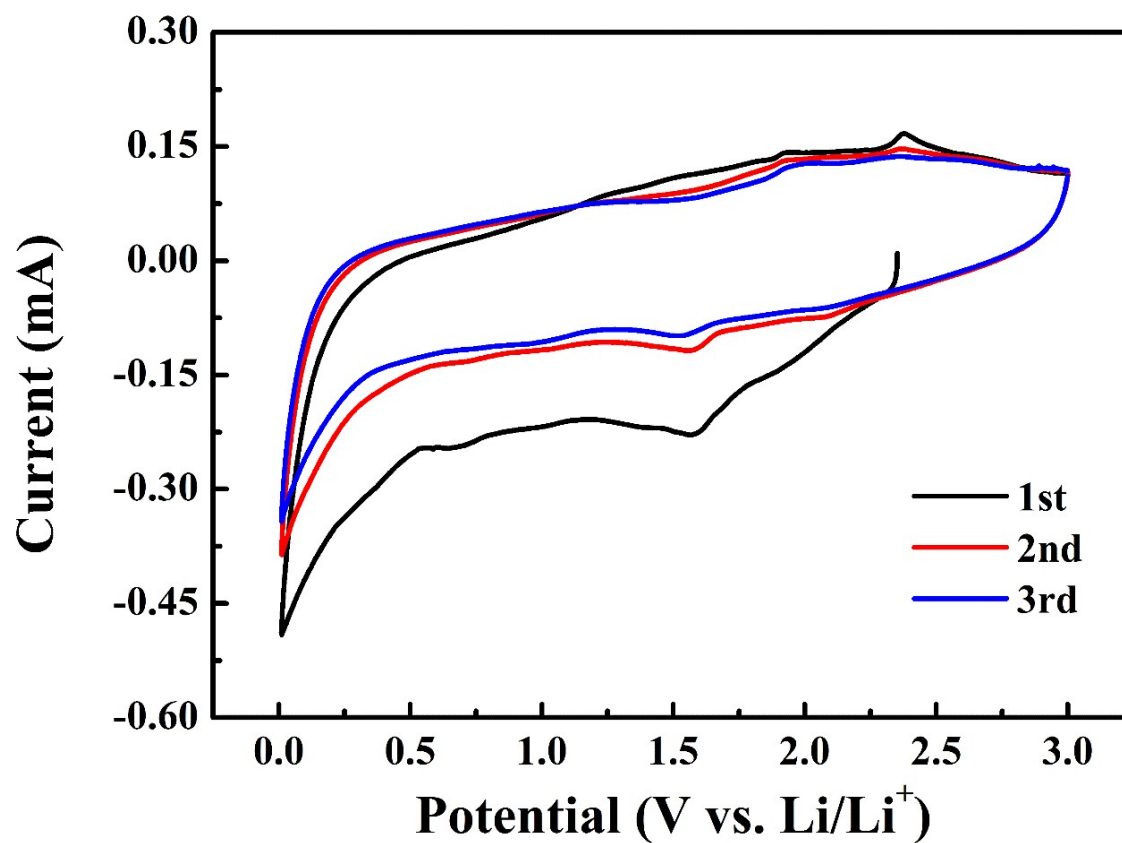

Fig. S7. CV curves of  $V_4C_3$ -MXene electrode for the first three cycles at  $0.1 \text{ mV s}^{-1}$ .

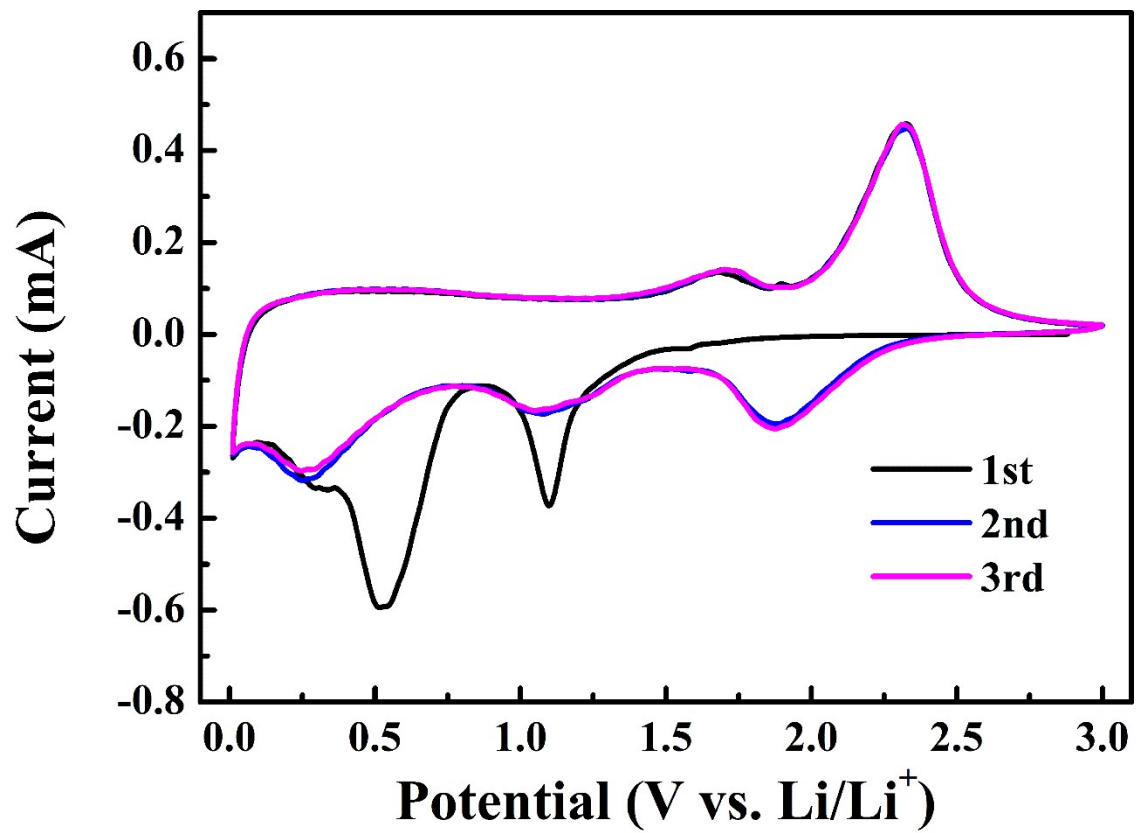

Fig. S8. CV curves of  $MoS_2$  electrode for the first three cycles at  $0.1 \text{ mV s}^{-1}$ .

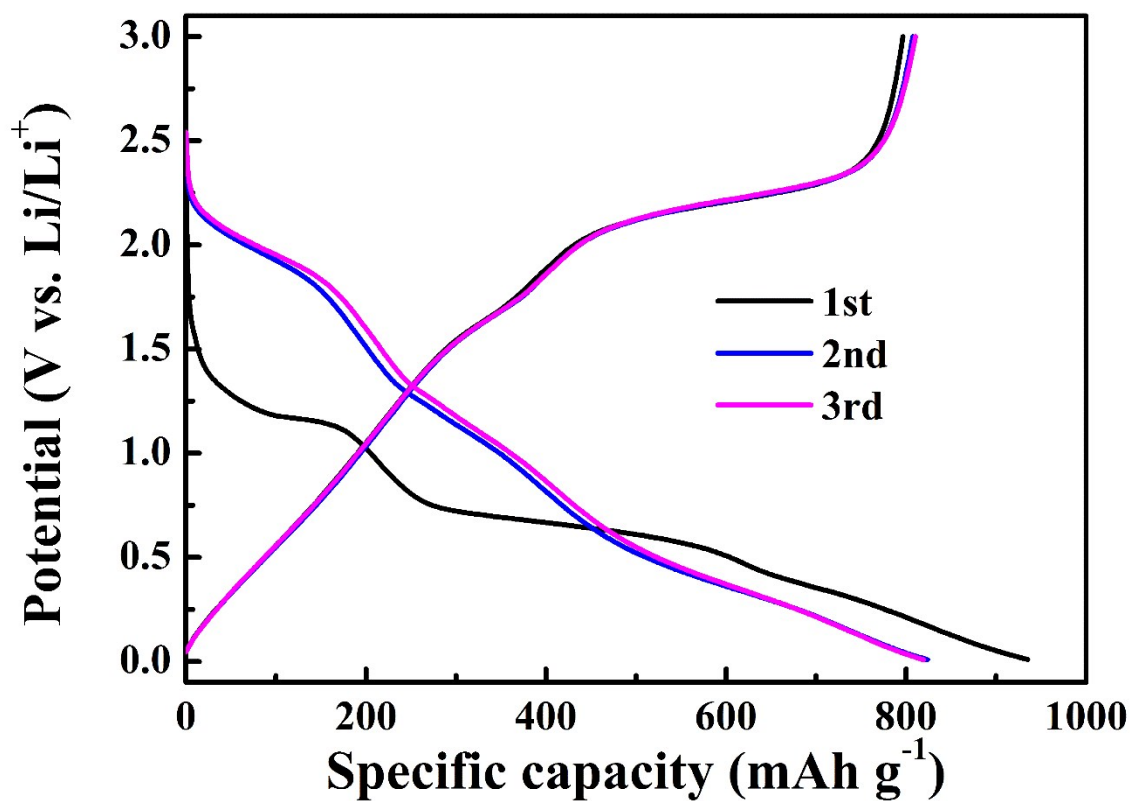

**Fig. S9.** Galvanostatic discharge and charge profiles of MoS<sub>2</sub> electrode for the first three cycles at 0.1 A g<sup>-1</sup>.

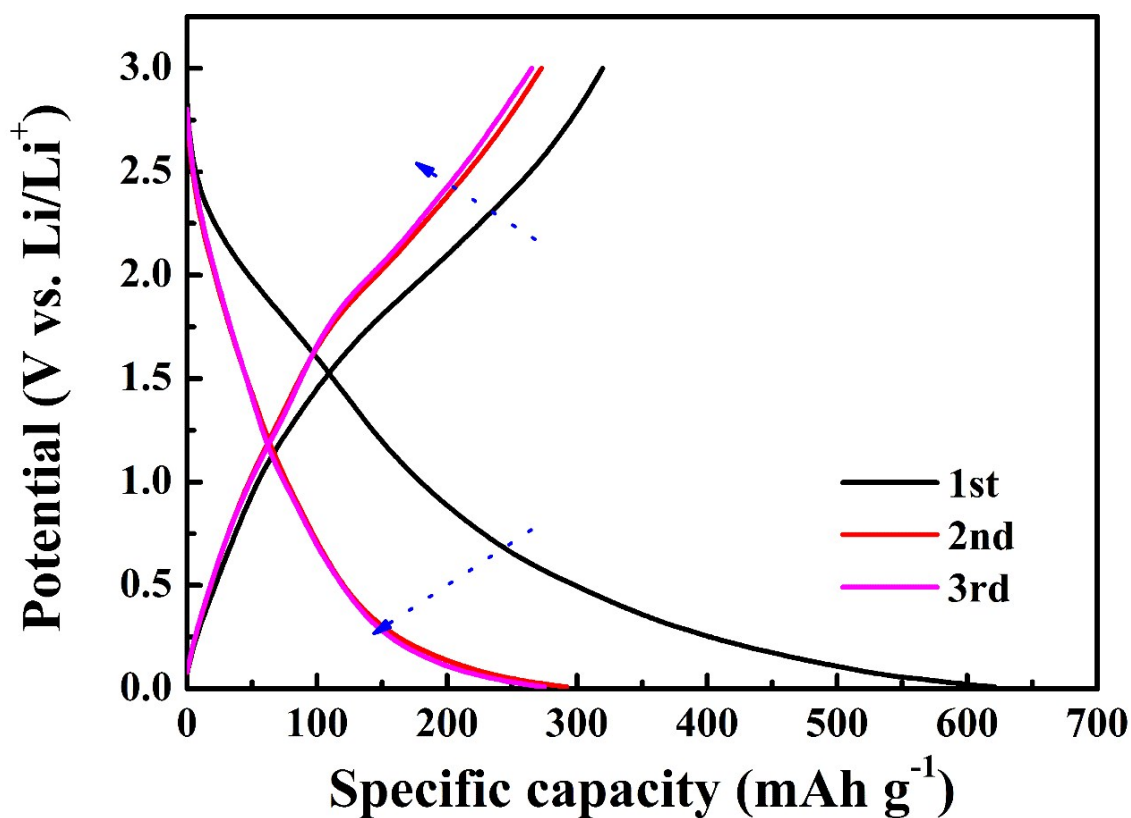

**Fig. S10.** Galvanostatic discharge and charge profiles of V<sub>4</sub>C<sub>3</sub>-MXene electrode for the first three cycles at 0.1 A g<sup>-1</sup>.

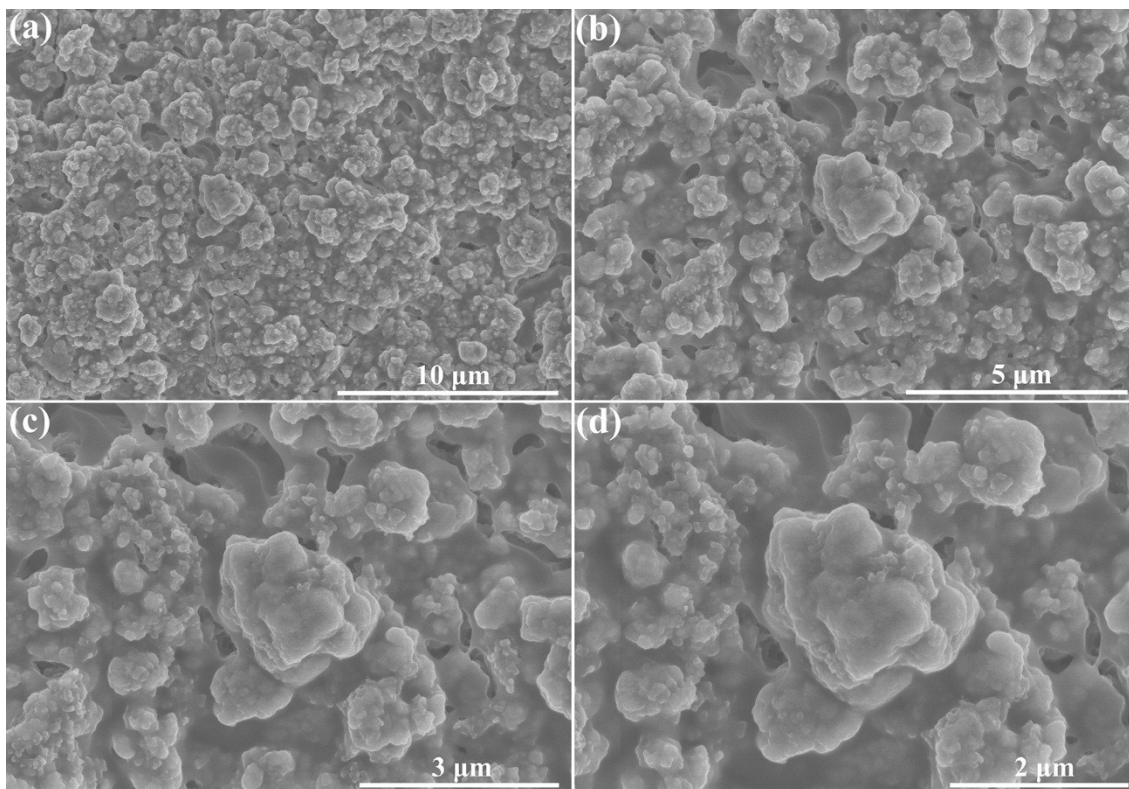

**Fig. S11.** The SEM images of the  $V_4C_3$ -MXene/ $MoS_2$ /C nano hybrid electrode after 450 cycles at  $1 \text{ A g}^{-1}$  at the different magnifications.

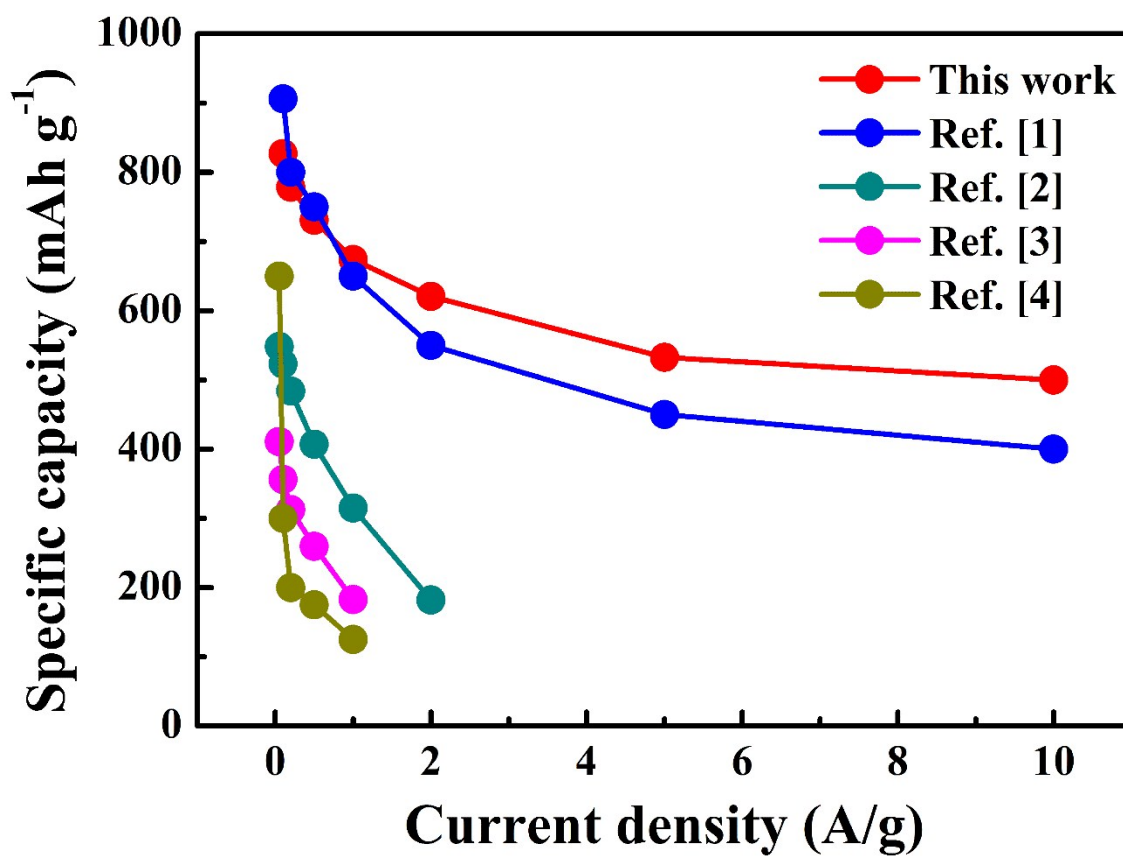



**Fig. S12.** The comparison of the rate performance of the V<sub>4</sub>C<sub>3</sub>-MXene/MoS<sub>2</sub>/C with recently reported MXene/MoS<sub>2</sub> composite materials in the lithium storage performance.

**Table S1.** The comparison of the element content for the V<sub>4</sub>C<sub>3</sub>-MXene/MoS<sub>2</sub>/C nanohybrid derived from the ICP-MS and EDS analysis.

| Elements | EDS (wt%) | ICP-MS (wt%) |
|----------|-----------|--------------|
| Mo       | 42.73     | 42.8         |
| V        | 8.09      | 8.2          |

**Table S2.** N<sub>2</sub> adsorption/desorption results of the four studied samples.

| Samples                                                  | Surface area (m <sup>2</sup> /g) | Main pore size (nm) | Pore volume (cc/g) |
|----------------------------------------------------------|----------------------------------|---------------------|--------------------|
| MoS <sub>2</sub>                                         | 9.4                              | 1.96                | 0.050              |
| V <sub>4</sub> C <sub>3</sub> -MXene/MoS <sub>2</sub>    | 12.5                             | 1.96                | 0.131              |
| MoS <sub>2</sub> /C                                      | 95.8                             | 1.87                | 0.284              |
| V <sub>4</sub> C <sub>3</sub> -MXene/MoS <sub>2</sub> /C | 116.0                            | 1.86                | 0.319              |

**Table S3.** The comparison of  $R_{ct}$ ,  $\sigma$ , and  $D_{Li^+}$  for different electrodes.

| Electrodes                                               | $R_{ct}$ ( $\Omega$ ) | $\sigma$ | $D_{Li^+}$ (cm <sup>2</sup> /s) |
|----------------------------------------------------------|-----------------------|----------|---------------------------------|
| MoS <sub>2</sub>                                         | 259.4                 | 504.4    | $5.7 \times 10^{-18}$           |
| MoS <sub>2</sub> @C                                      | 153.5                 | 202.0    | $3.6 \times 10^{-18}$           |
| V <sub>4</sub> C <sub>3</sub> -MXene/MoS <sub>2</sub>    | 105.8                 | 89.7     | $1.8 \times 10^{-17}$           |
| V <sub>4</sub> C <sub>3</sub> -MXene/MoS <sub>2</sub> /C | 67.8                  | 36.2     | $1.1 \times 10^{-16}$           |

## References

1 K. Ma; H. Jiang; Y. Hu; C. Li, *Adv. Funct. Mater.* 2018, **28**, 1804306.

- 2 C. Chen; X. Xie; B. Anasori; A. Sarycheva; T. Makaryan; M. Q. Zhao; P. Urbankowski; L. Miao; J. Jiang; Y. Gogotsi, *Angew. Chem., Int. Ed.* 2018, **57**, 1846-1850.
- 3 G. Y. Du; M. L. Tao; W. Gao; Y. Q. Zhang; R. M. Zhan; S. J. Bao; M. W. Xu, *Inorg. Chem. Front.* 2019, **6**, 117-125.
- 4 C. J. Shen; L. B. Wang; A. G. Zhou; H. Zhang; Z. H. Chen; Q. K. Hu; G. Qin, *J. Electrochem. Soc.* 2017, **164**, A2654-A2659.
